# Supplementary material for: On Nonlinear Regression for Trends in Split-Belt Treadmill Training
Source: PubMed Central journal article supplement (PMC7602156; doi:10.3390/brainsci10100737), 2020-10-14

# Supplementary File: “On Nonlinear Regression for Trends in Split-belt Treadmill Training”

Usman Rashid  
09/07/2020

## Section 3.1.1: Fit and diagnostic plots for group-averaged data

### Session II, Adaptation

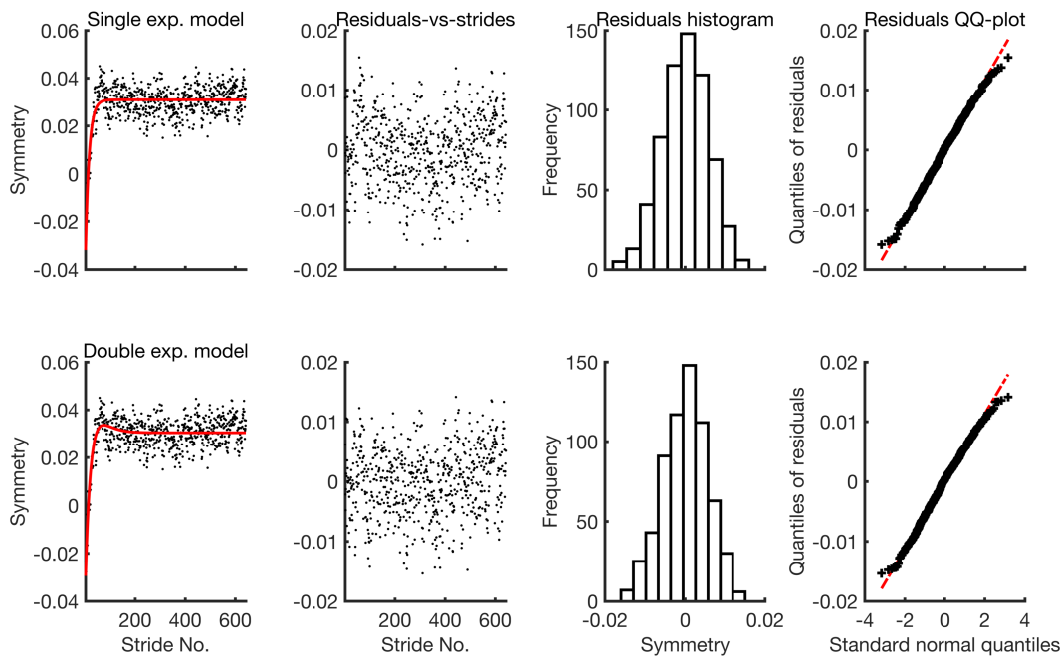

### Session I, De-adaptation

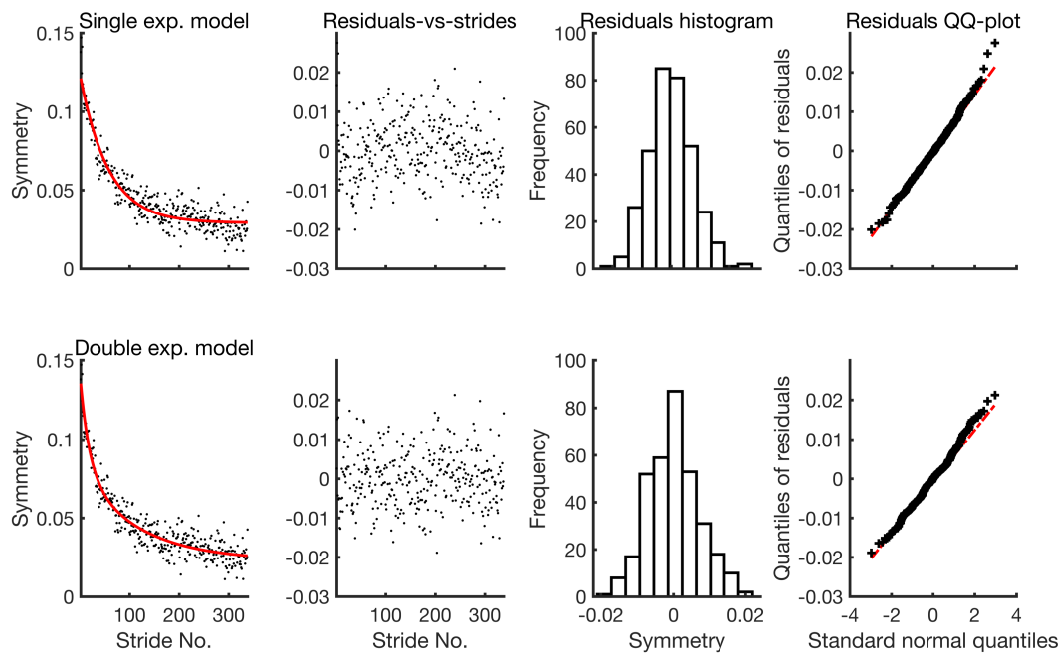

# Session II, De-adaptation

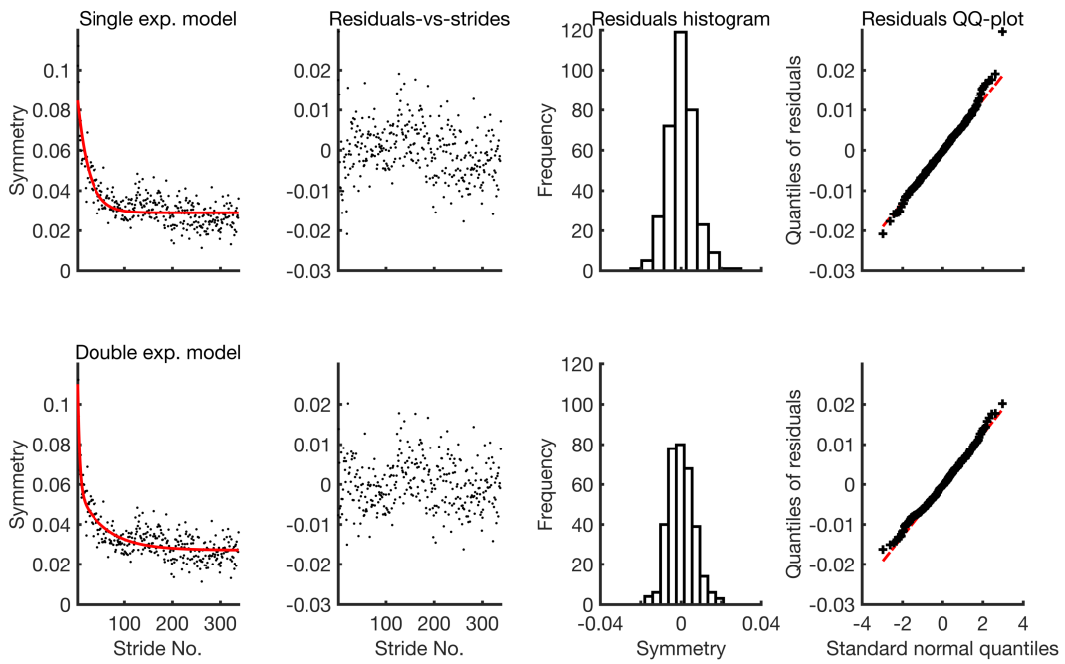

Section 3.1.2: Estimates and 95% confidence intervals without the linearisation assumption. All the numbers are rounded to three decimal places.

| Phase           | Parameter   | Session                 |                         | CI Overlap |
|-----------------|-------------|-------------------------|-------------------------|------------|
|                 |             | Session I               | Session II              |            |
| <b>Adapt</b>    | $\hat{a}_s$ | -0.050 [-0.054, -0.046] | 0.641 [ 0.021, 0.942]   | No*        |
|                 | $\hat{b}_s$ | -0.004 [-0.005, -0.003] | -0.033 [-0.039, -0.019] | No*        |
|                 | $\hat{a}_f$ | -0.088 [-0.094, -0.087] | -0.704 [-1.069, -0.084] | Yes        |
|                 | $\hat{b}_f$ | -0.047 [-0.054, -0.041] | -0.035 [-0.051, -0.031] | Yes        |
|                 | $\hat{c}$   | 0.024 [ 0.021, 0.027]   | 0.030 [ 0.030, 0.031]   | No*        |
| <b>De-adapt</b> | $\hat{a}_s$ | 0.063 [ 0.041, 0.134]   | 0.030 [ 0.018, 0.039]   | No*        |
|                 | $\hat{b}_s$ | -0.010 [-0.013, 0.000]  | -0.017 [-0.026, -0.004] | Yes        |
|                 | $\hat{a}_f$ | 0.053 [ 0.039, 0.066]   | 0.068 [ 0.052, 0.086]   | Yes        |
|                 | $\hat{b}_f$ | -0.064 [-0.116, -0.029] | -0.239 [-0.401, -0.087] | Yes        |
|                 | $\hat{c}$   | 0.024 [-0.943, 0.027]   | 0.027 [ 0.019, 0.029]   | Yes        |

Section 3.1.2: Estimates and 95% confidence intervals with the linearisation assumption. All the numbers are rounded to three decimal places.

| Phase           | Parameter   | Session                 |                            | CI Overlap |
|-----------------|-------------|-------------------------|----------------------------|------------|
|                 |             | Session I               | Session II                 |            |
| <b>Adapt</b>    | $\hat{a}_s$ | -0.05 [-0.054, -0.046]  | 0.641 [-224.692, 225.973]  | Yes        |
|                 | $\hat{b}_s$ | -0.004 [-0.005, -0.003] | -0.033 [-0.384, 0.317]     | Yes        |
|                 | $\hat{a}_f$ | -0.088 [-0.094, -0.081] | -0.704 [-226.033, 224.625] | Yes        |
|                 | $\hat{b}_f$ | -0.047 [-0.054, -0.039] | -0.035 [-0.384, 0.313]     | Yes        |
|                 | $\hat{c}$   | 0.024 [0.021, 0.027]    | 0.03 [0.030, 0.031]        | No*        |
| <b>De-adapt</b> | $\hat{a}_s$ | 0.063 [0.050, 0.076]    | 0.030 [0.024, 0.036]       | No*        |
|                 | $\hat{b}_s$ | -0.010 [-0.013, -0.007] | -0.017 [-0.022, -0.012]    | Yes        |
|                 | $\hat{a}_f$ | 0.053 [0.039, 0.068]    | 0.068 [0.052, 0.083]       | Yes        |
|                 | $\hat{b}_f$ | -0.064 [-0.094, -0.035] | -0.239 [-0.333, -0.145]    | No*        |
|                 | $\hat{c}$   | 0.024 [0.021, 0.028]    | 0.027 [0.026, 0.028]       | Yes        |

Section 3.2: Difference in AIC values from the double and single exponential models for participant symmetry series.

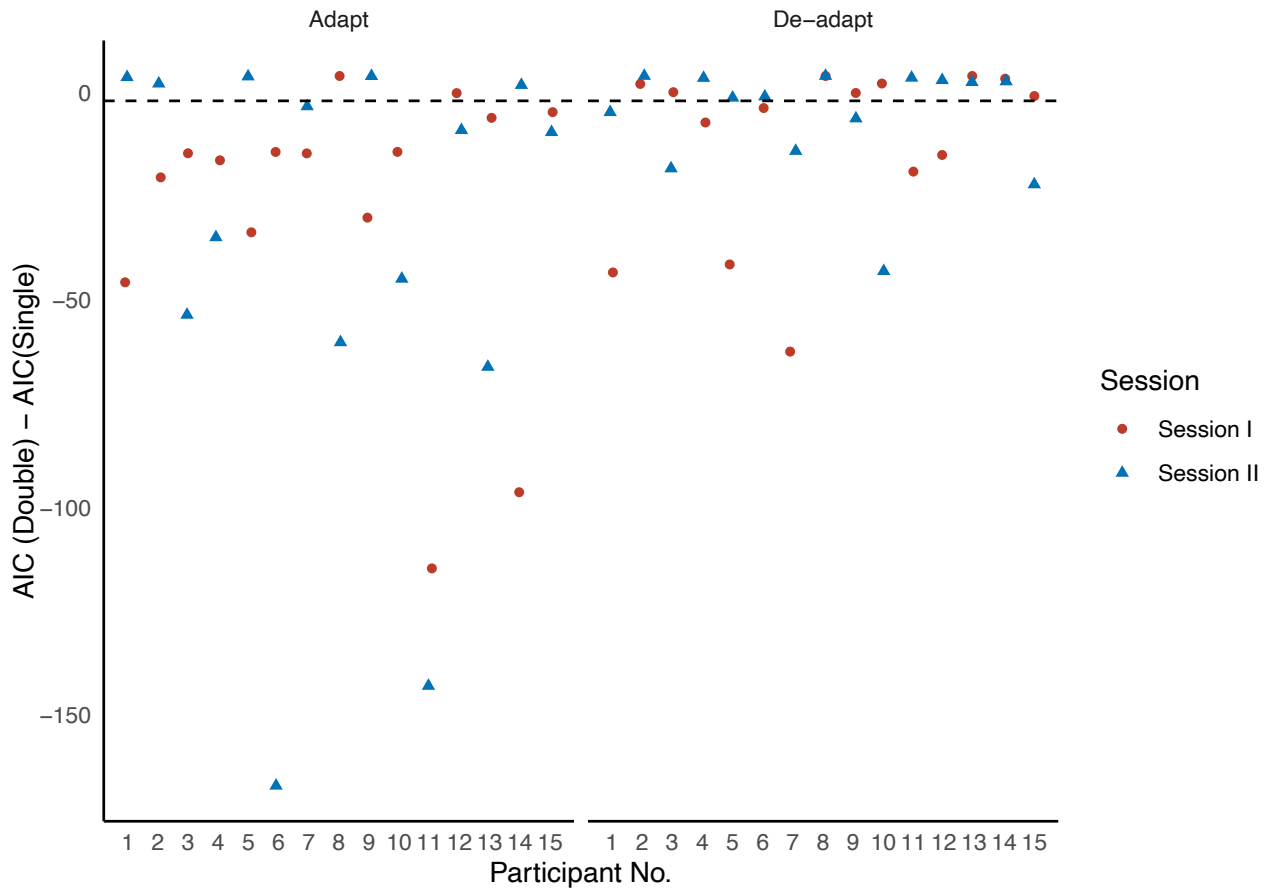

**Note:** The horizontal dotted line is plotted at -2.

## Section 3.2: Double exponential fit and residuals-vs-strides plots for individual symmetry series

### Session I, Adaptation

#### Participant 01, 02

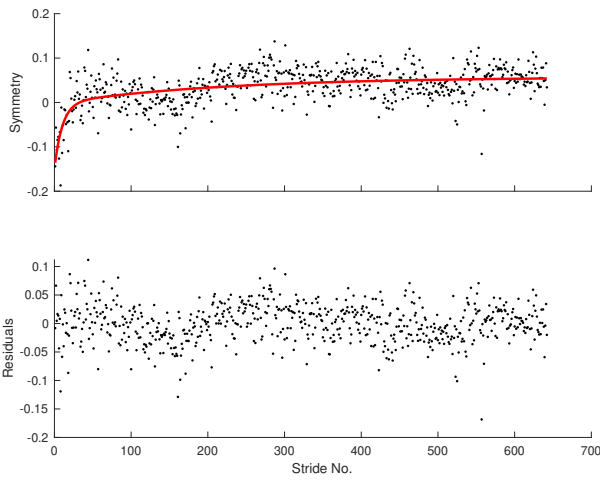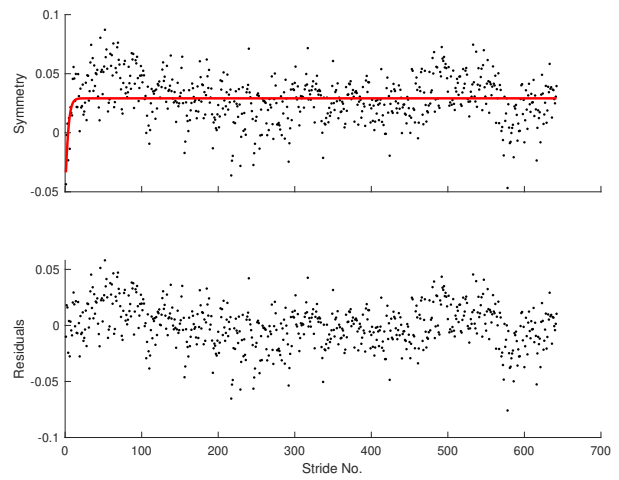

#### Participant 03, 04

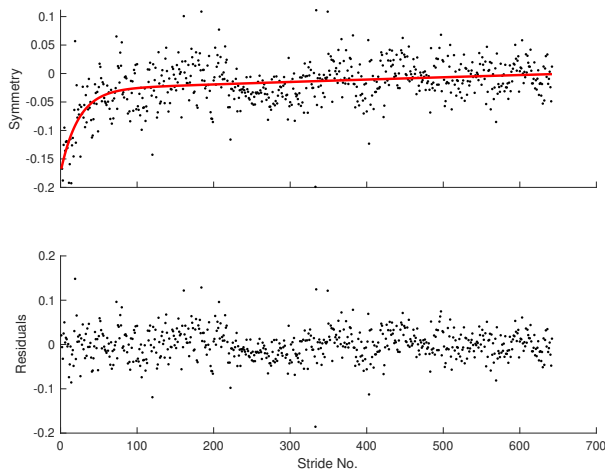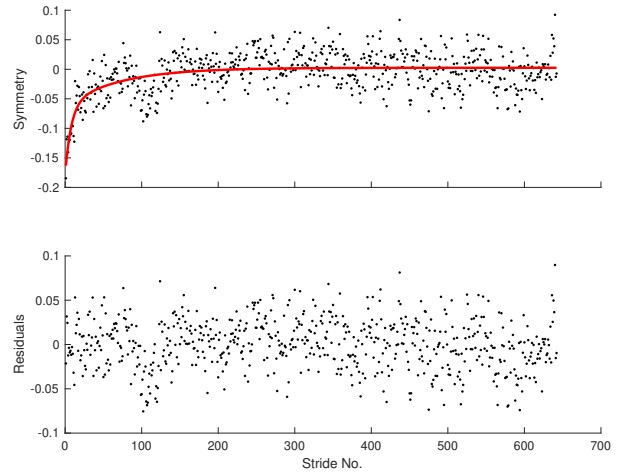

#### Participant 05, 06

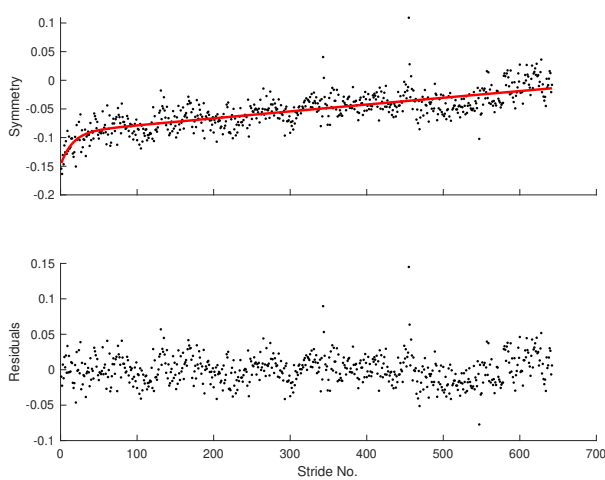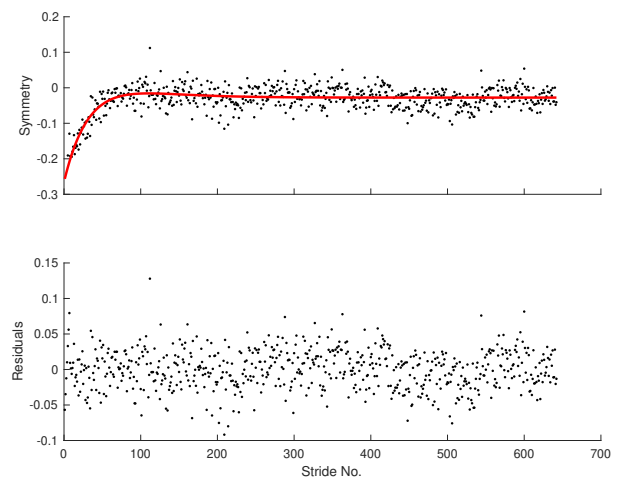

### Participant 07, 08

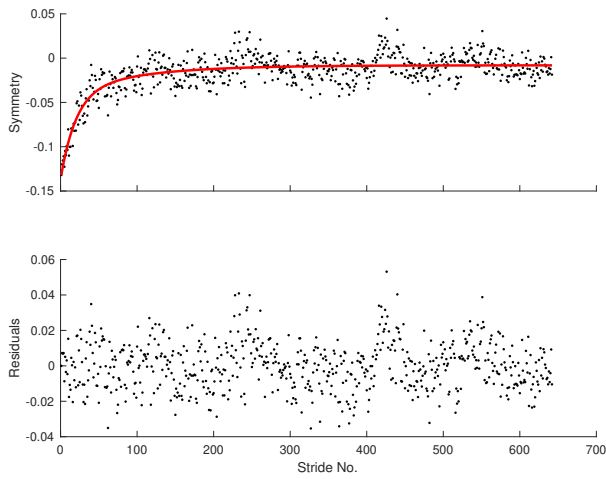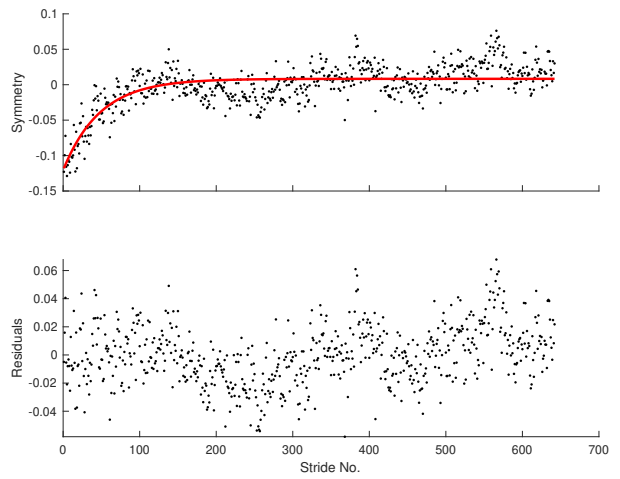

### Participant 09, 10

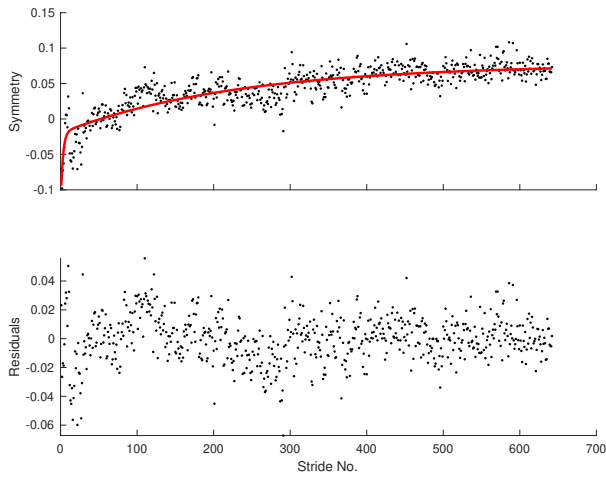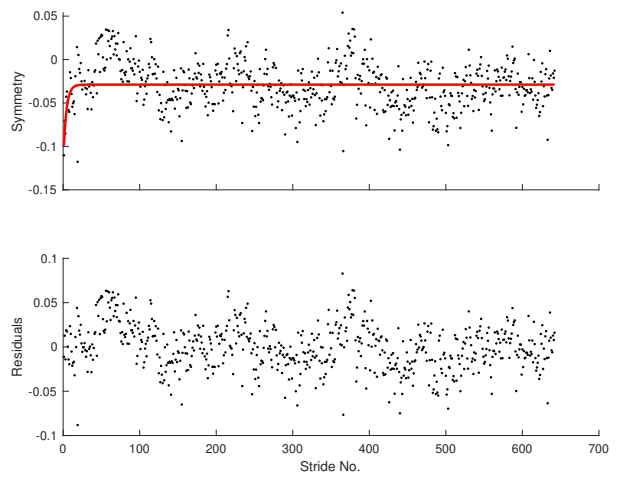

### Participant 11, 12

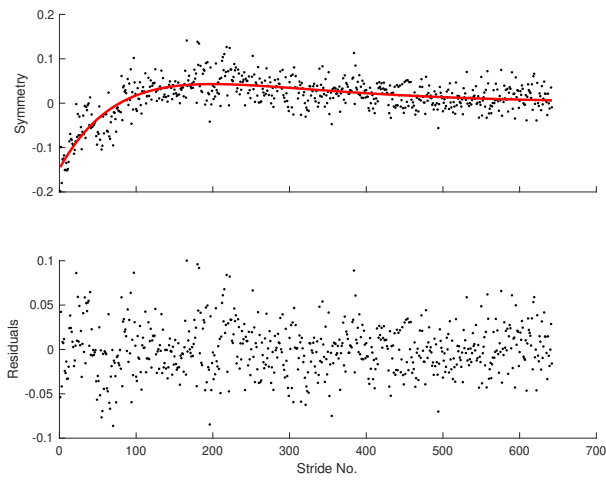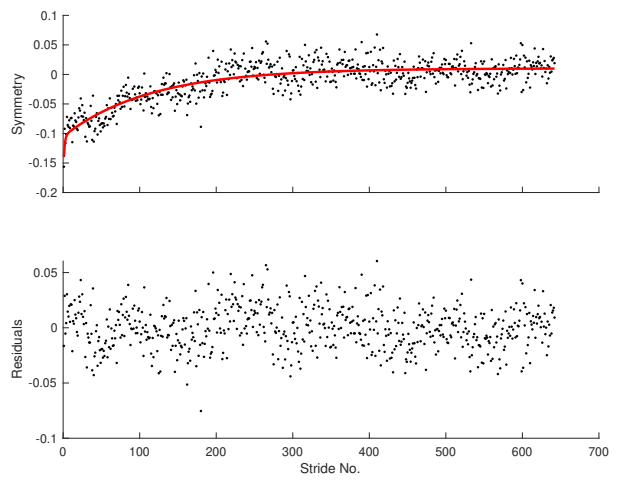

## Participant 13, 14

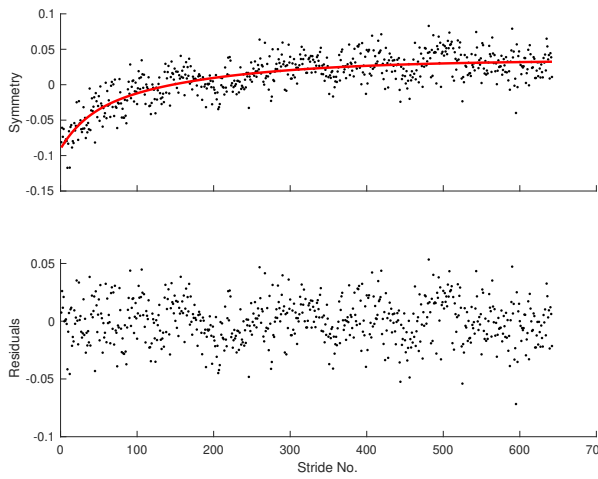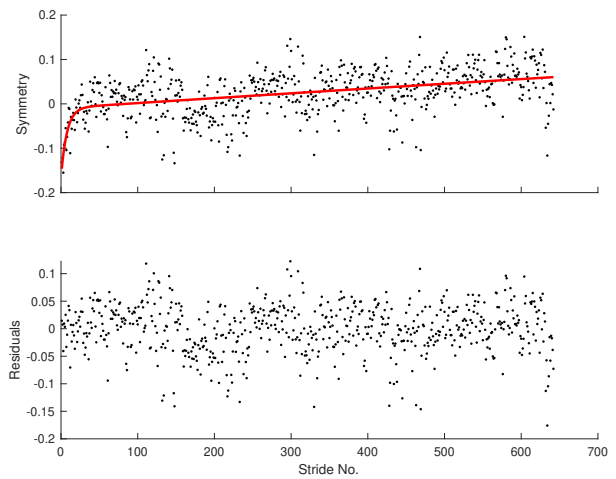

## Participant 15

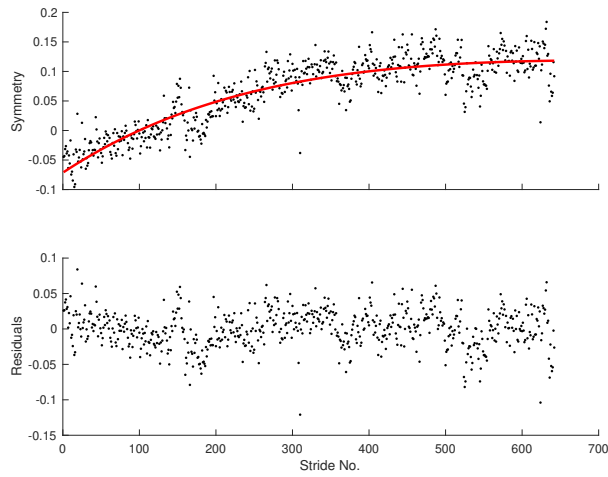

## Session II, Adaptation

### Participant 01, 02

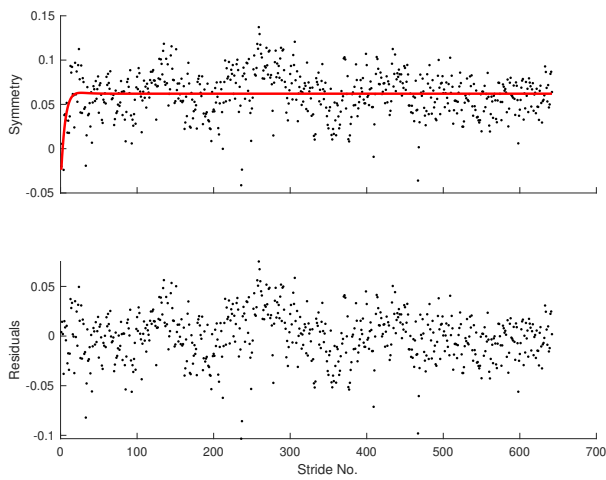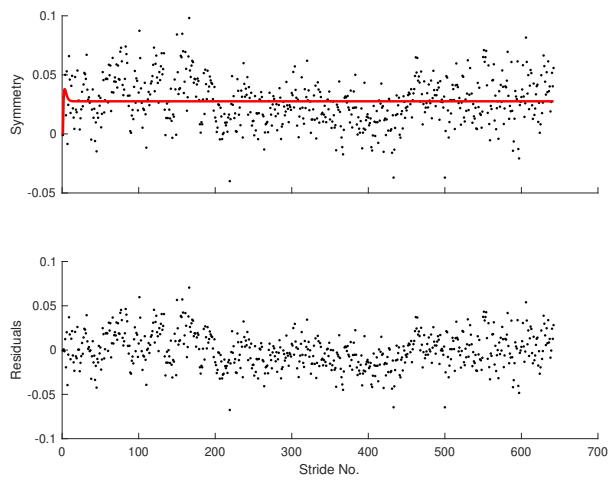

### Participant 03, 04

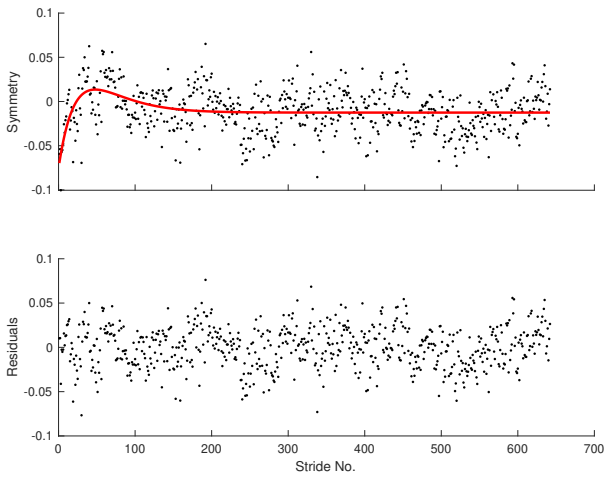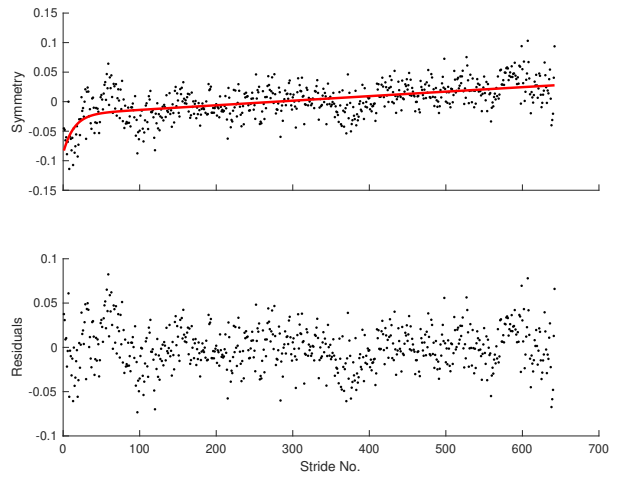

### Participant 05, 06

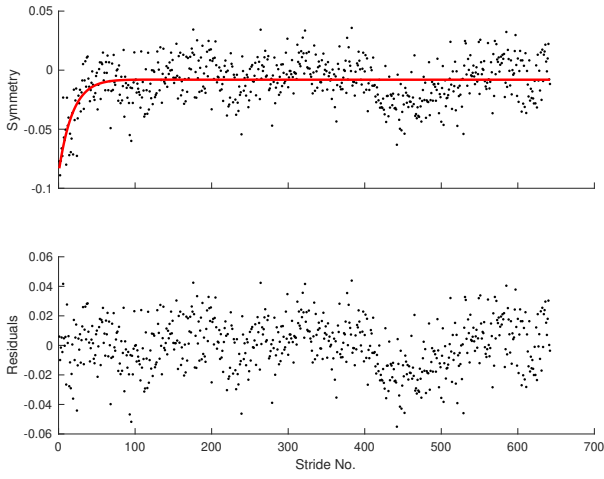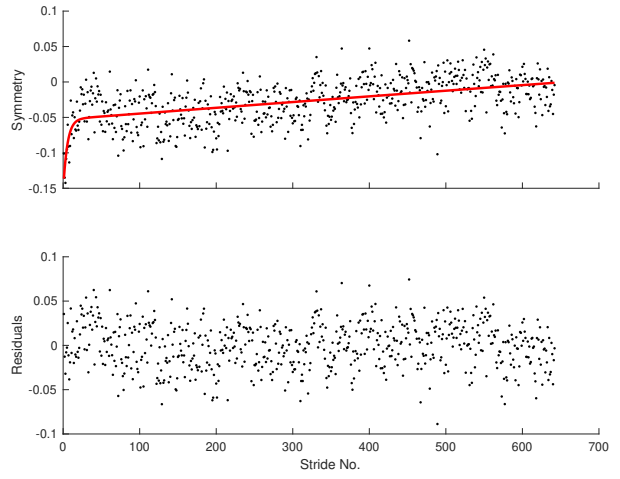

### Participant 07, 08

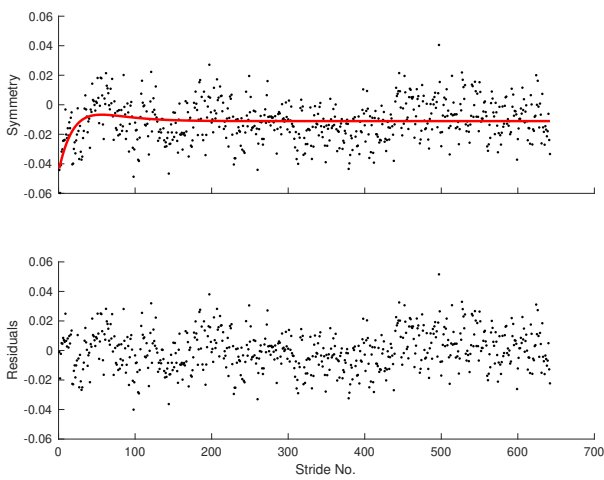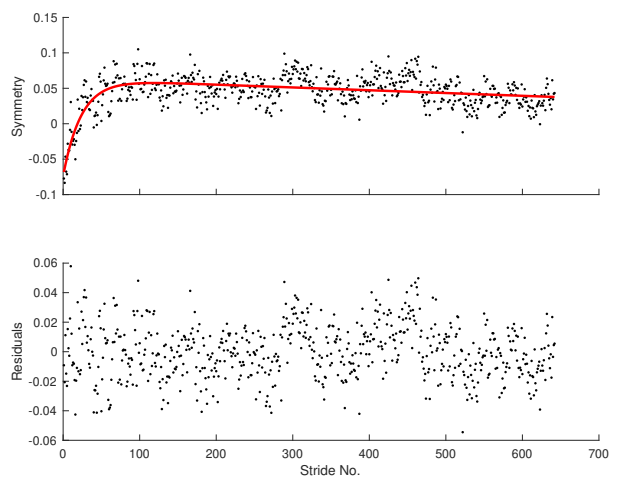



### Participant 09, 10

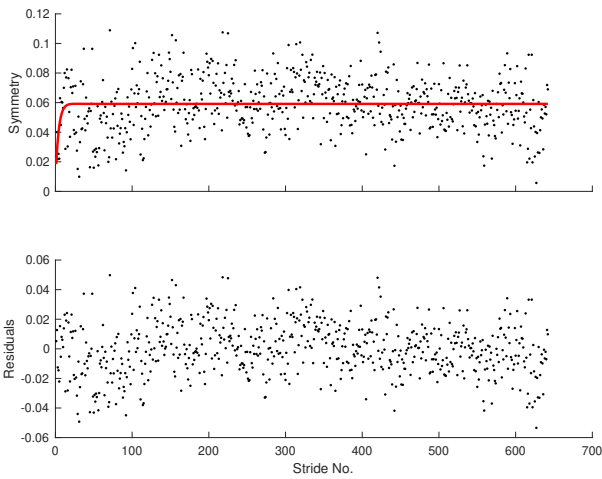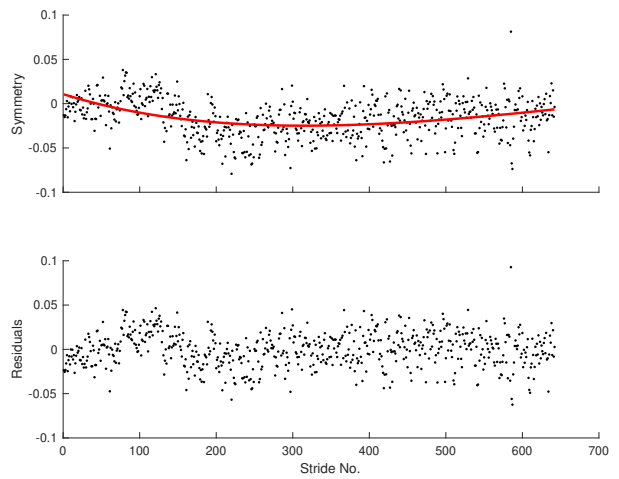

### Participant 11, 12

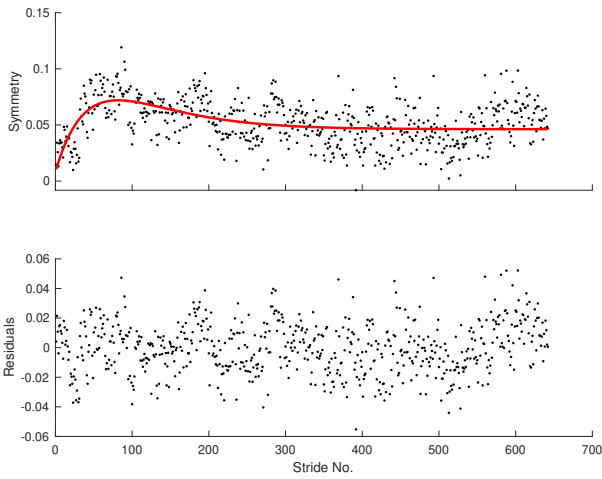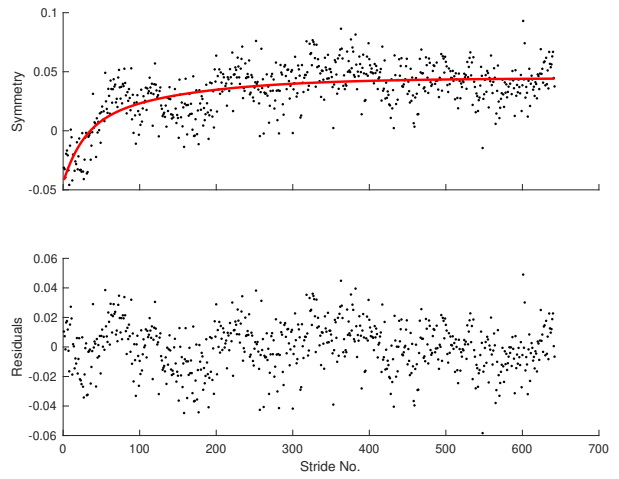

### Participant 13, 14

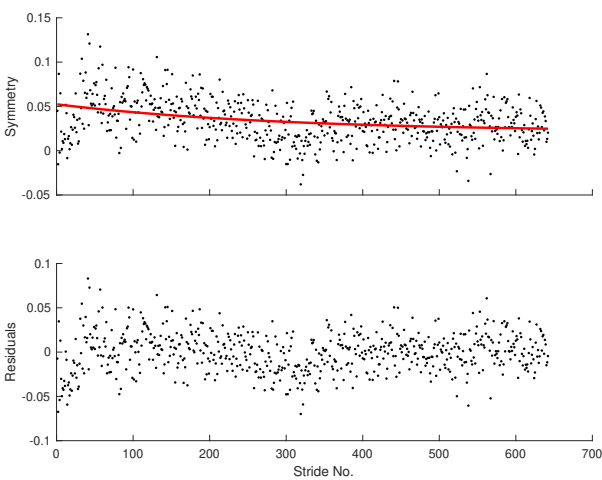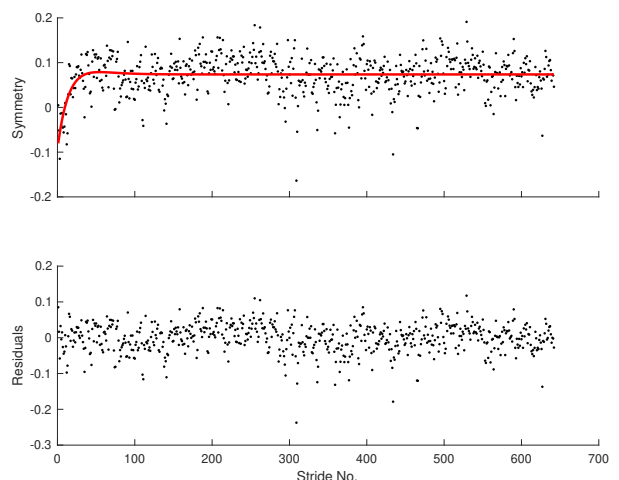

# Participant 15

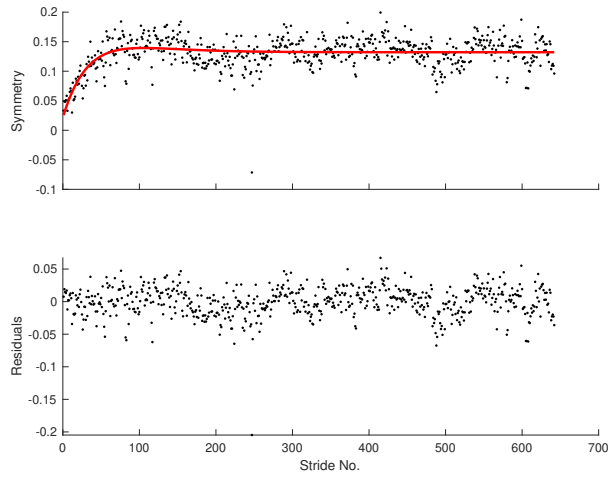

## Session I, De-adaptation

### Participant 01, 02

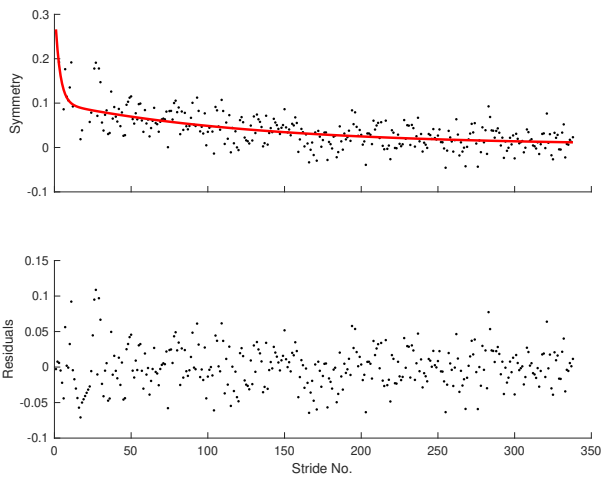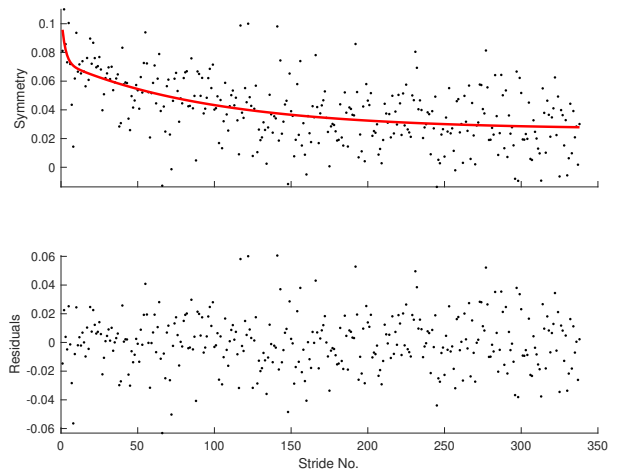

### Participant 03, 04

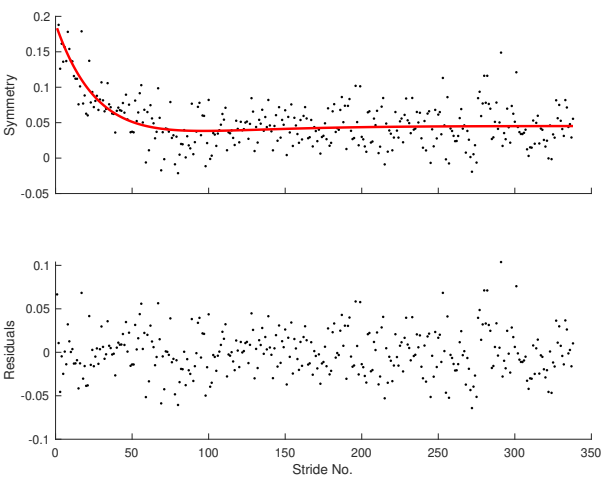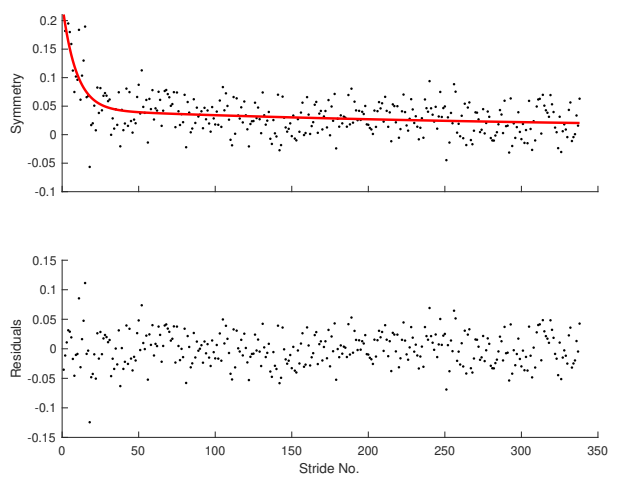

### Participant 05, 06

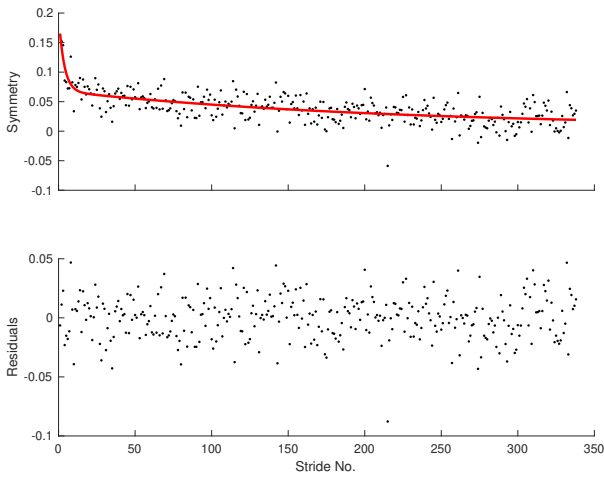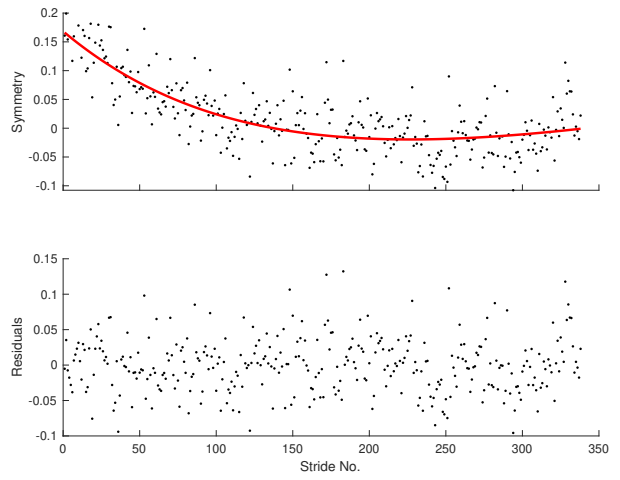

### Participant 07, 08

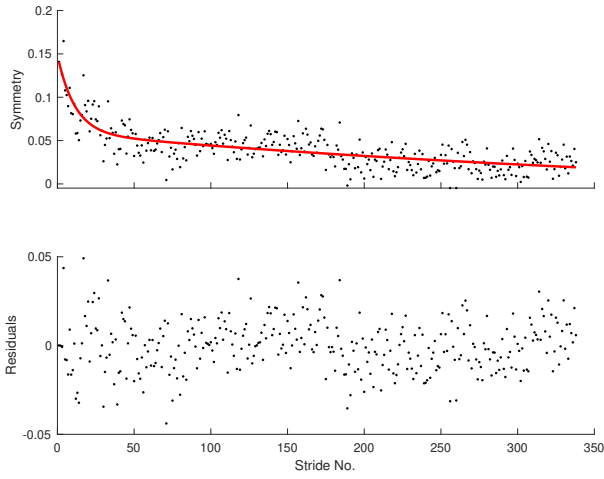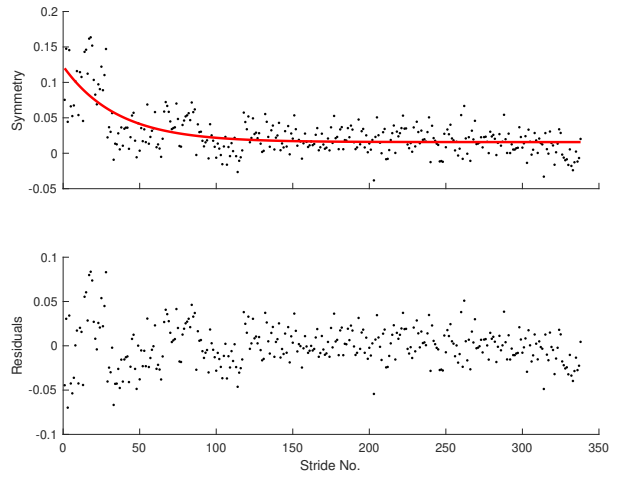

### Participant 09, 10

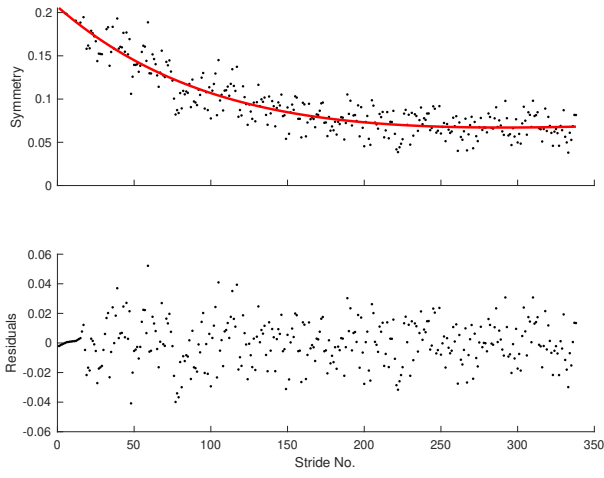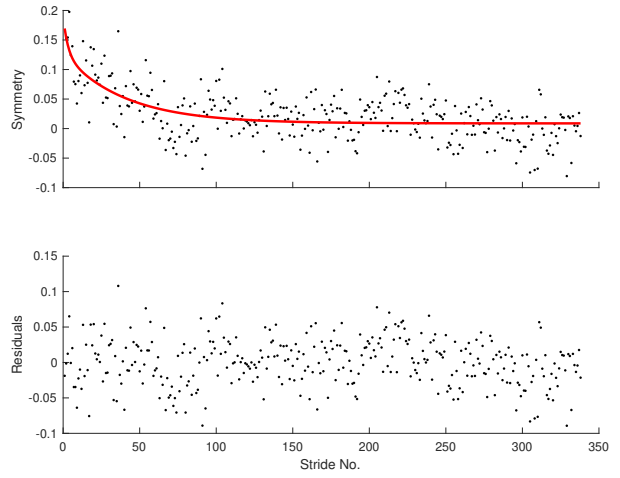

### Participant 11, 12

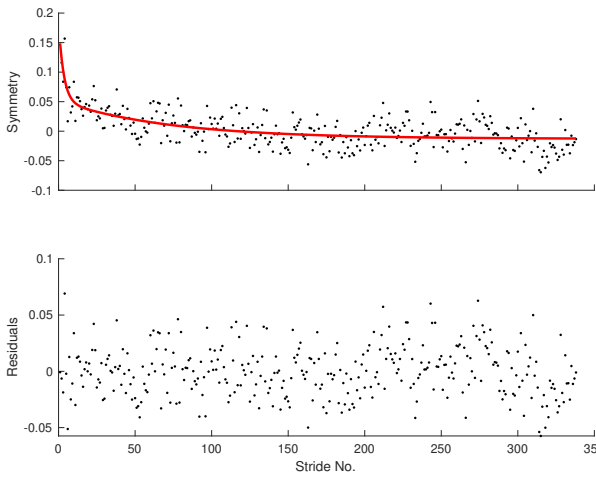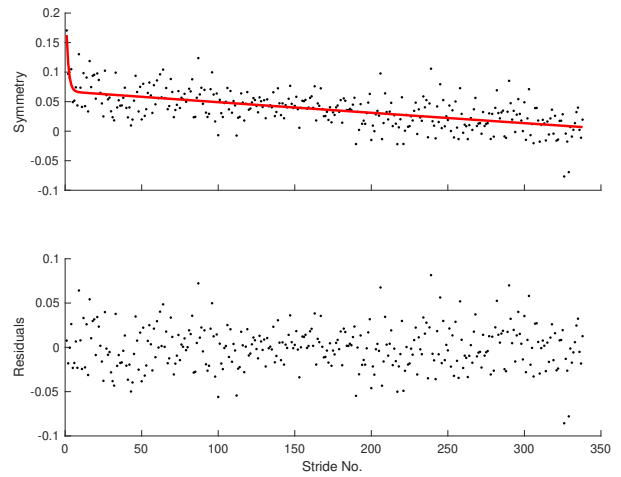

### Participant 13, 14

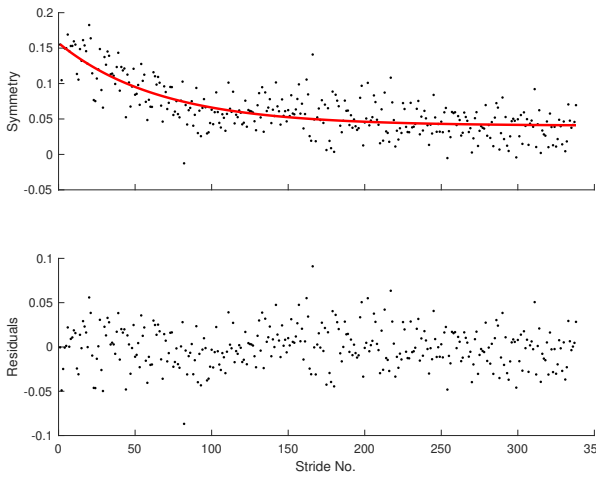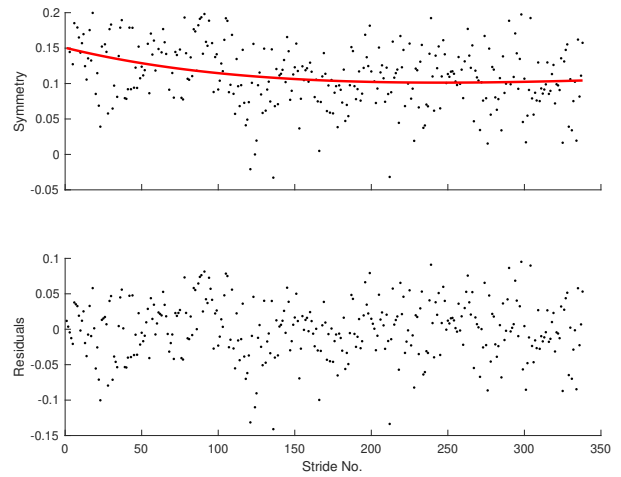

### Participant 15

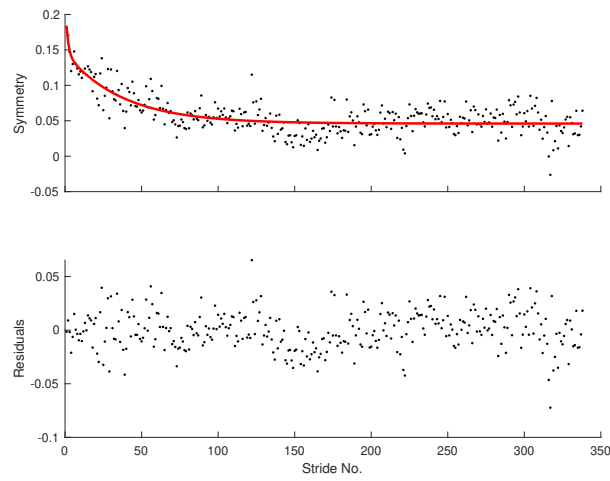

## Session II, De-adaptation

### Participant 01, 02

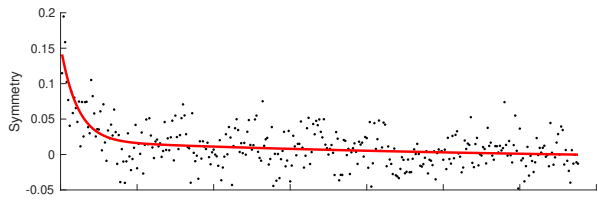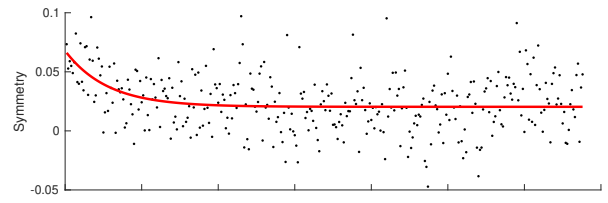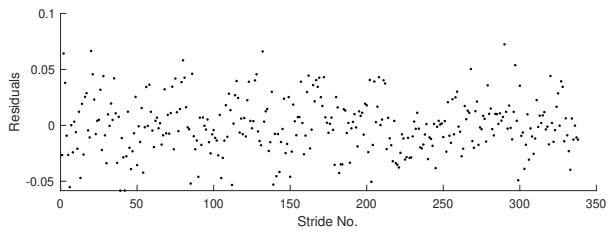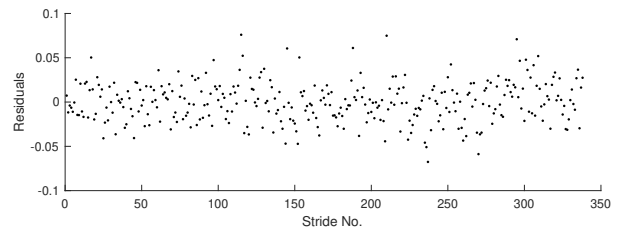

### Participant 03, 04

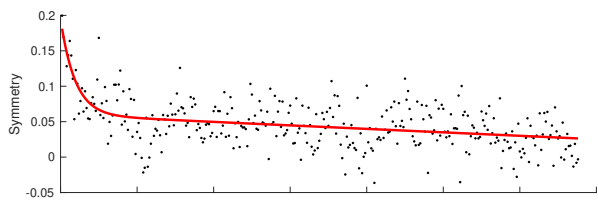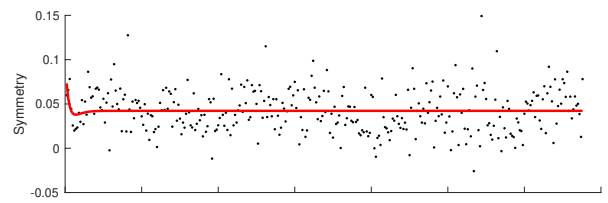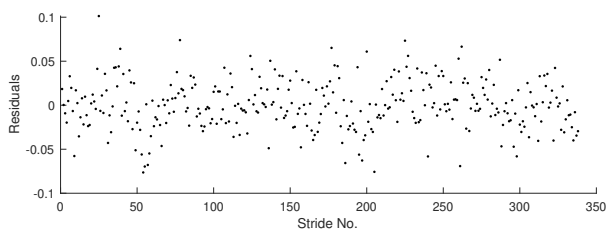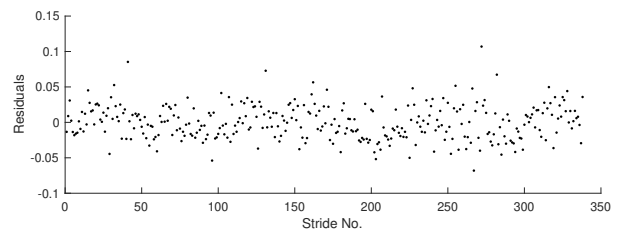

### Participant 05, 06

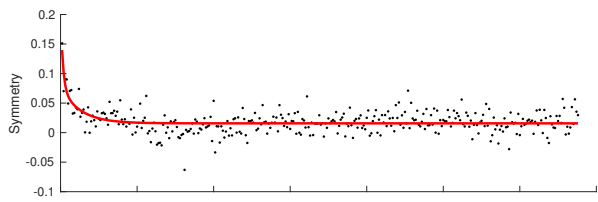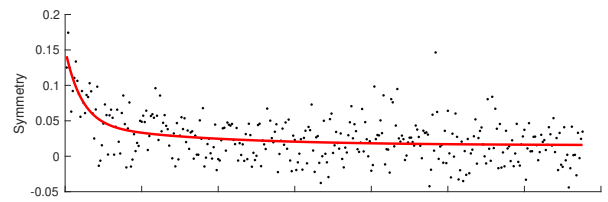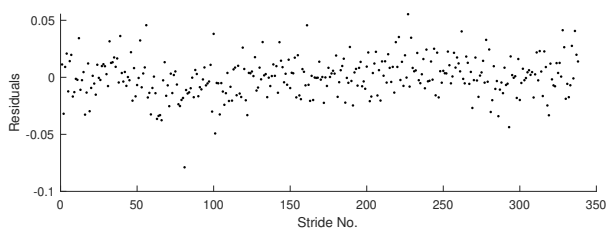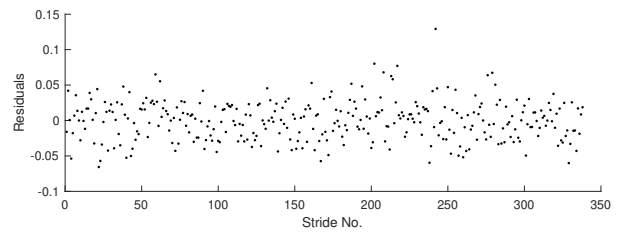

### Participant 07, 08

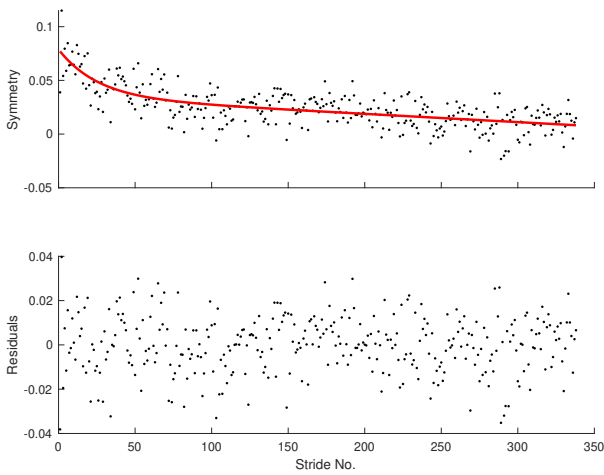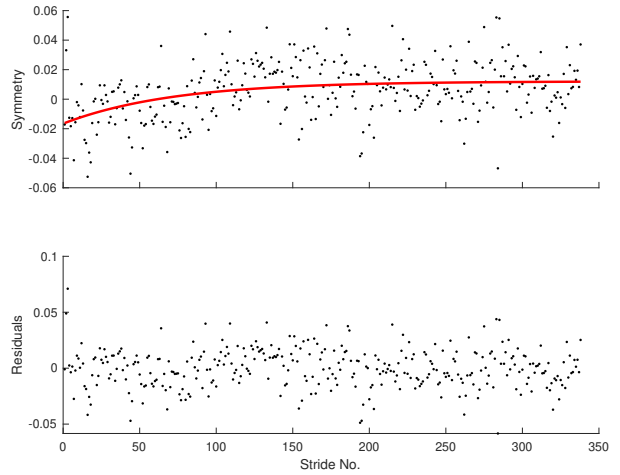

### Participant 09, 10

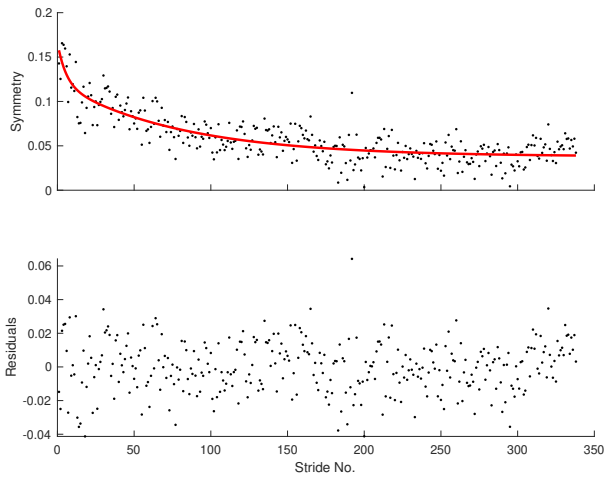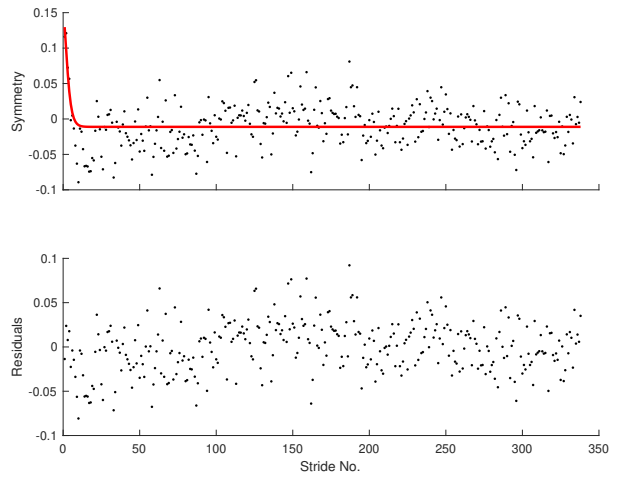

### Participant 11, 12

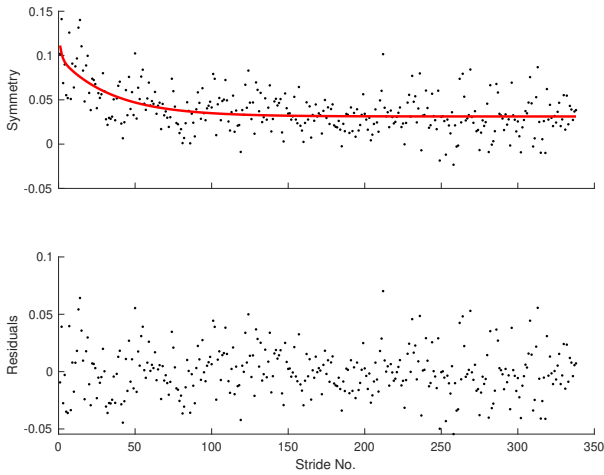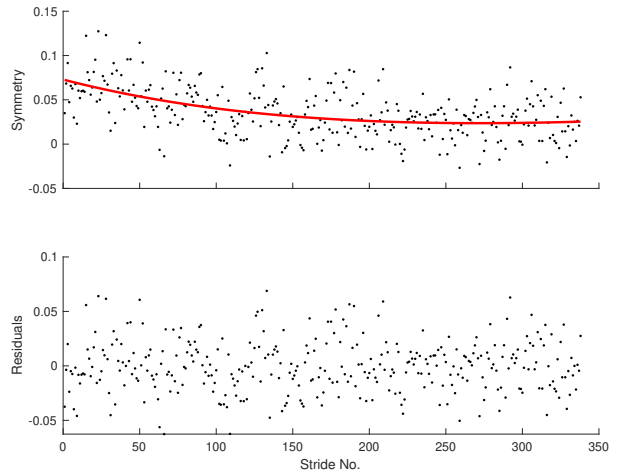

### Participant 13, 14

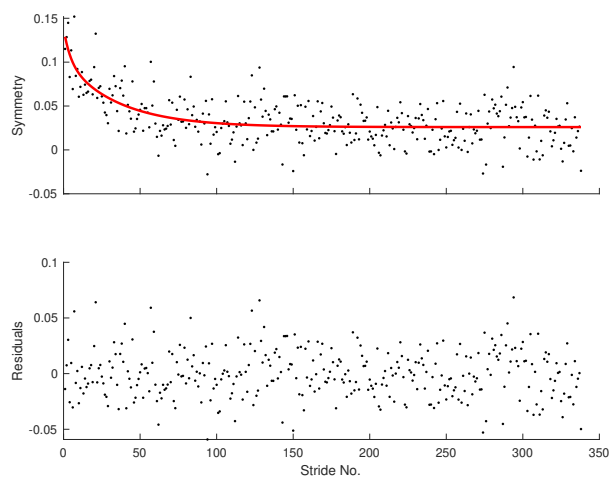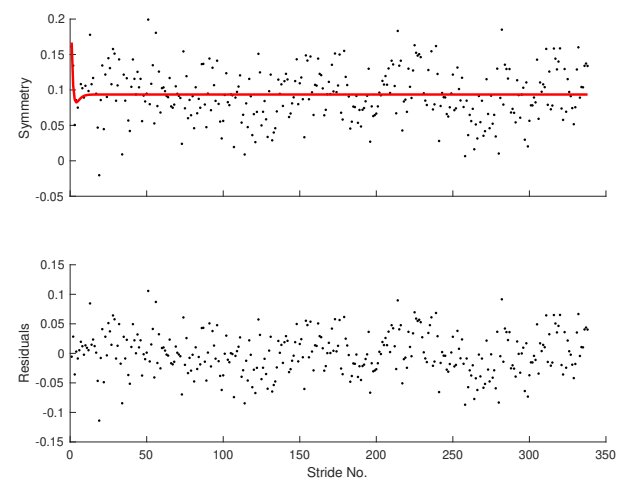

### Participant 15

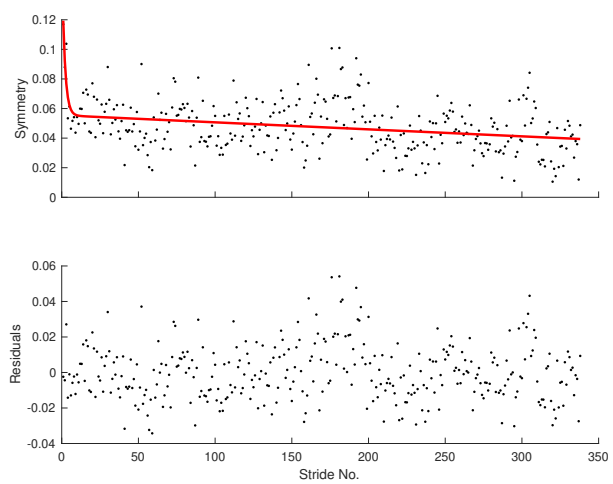

Supplement: brainsci-10-00737-s001.pdf [file brainsci-10-00737-s001.pdf]
